# Supplementary material
Source: PubMed Central journal article supplement (PMC8054723)
Supplement: sj-pdf-2-jcb-10.1177_0271678X20964344.pdf [file sj-pdf-2-jcb-10.1177_0271678X20964344.pdf]

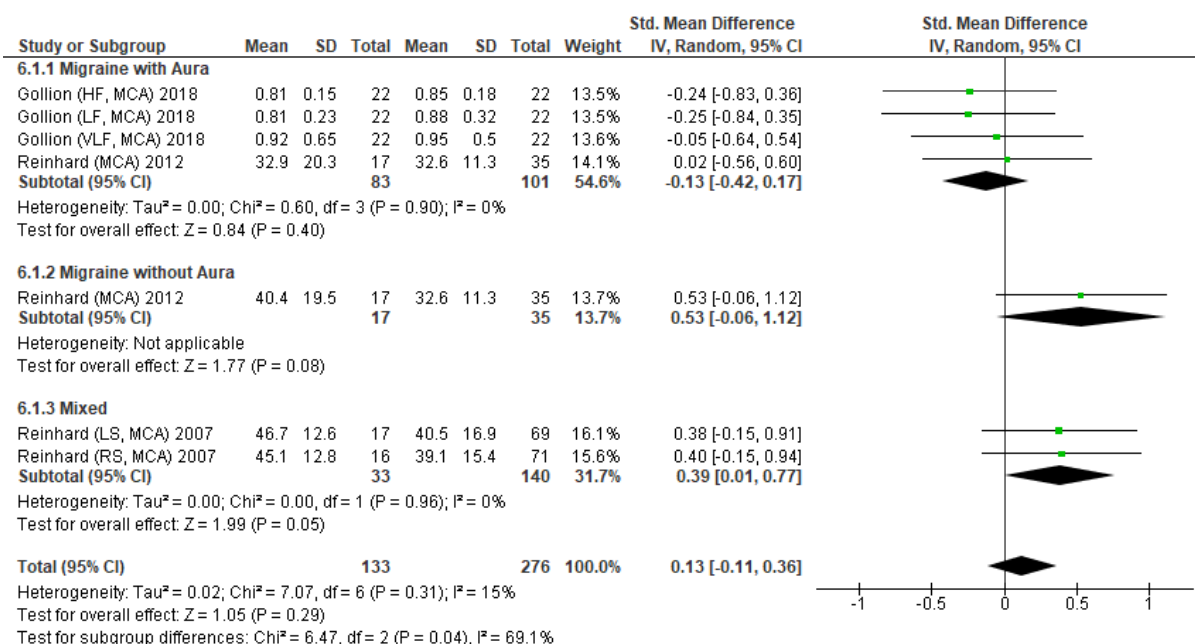

**Supplemental Figure 1: Forest plot of six quantitative comparisons of phase in the anterior circulation in migraineurs versus controls taken from three studies**

**Abbreviations:** HF, high frequency; LF, low frequency; LS, left side of cerebral artery; MCA, middle cerebral artery; RS, right side of cerebral artery; VLF, very low frequency

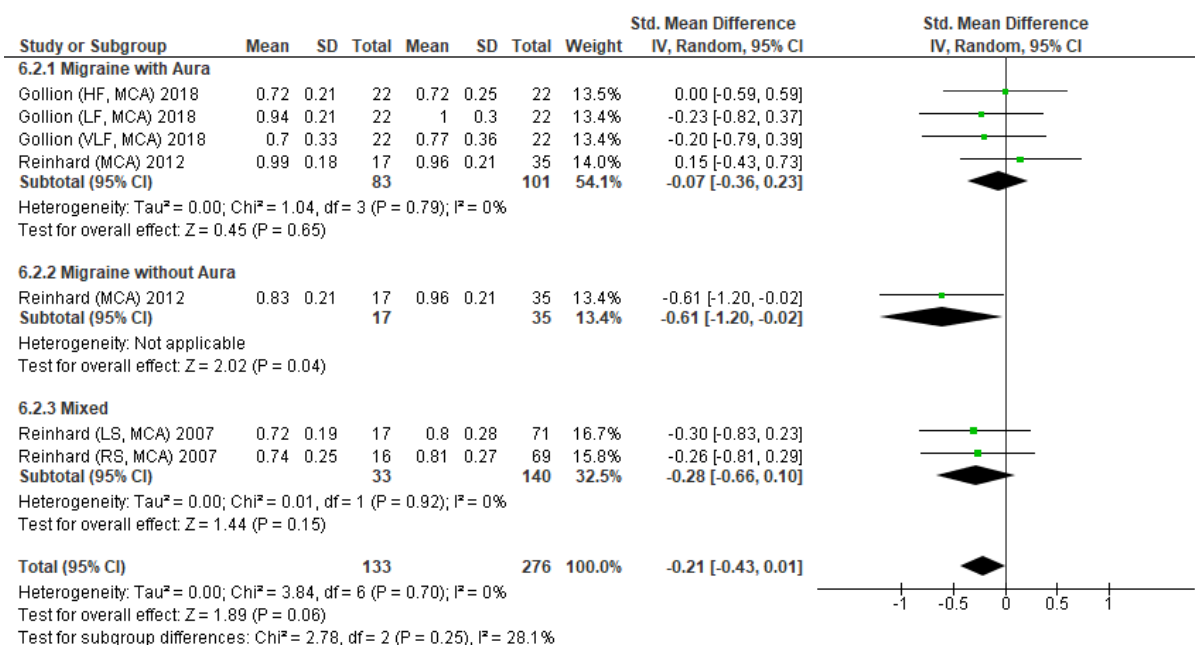

**Supplemental Figure 2: Forest plot of six quantitative comparisons of gain in the anterior circulation in migraineurs versus controls taken from three studies**

**Abbreviations:** HF, high frequency; LF, low frequency; LS, left side of cerebral artery; MCA, middle cerebral artery; RS, right side of cerebral artery; VLF, very low frequency

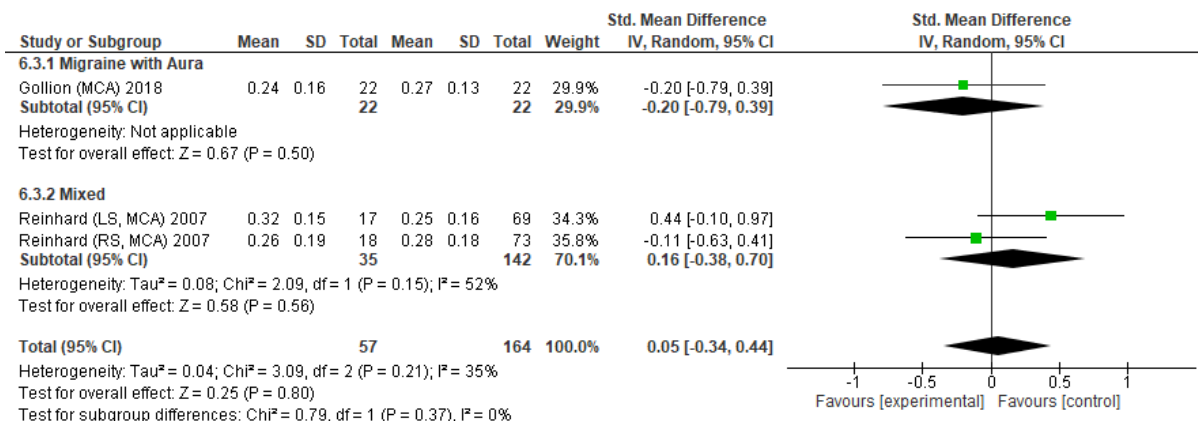

**Supplemental Figure 3: Forest plot of three quantitative comparisons of Mx in the anterior circulation in migraineurs versus controls taken from two studies**

Abbreviations: LS, left side of cerebral artery; MCA, middle cerebral artery; RS, right side of cerebral artery

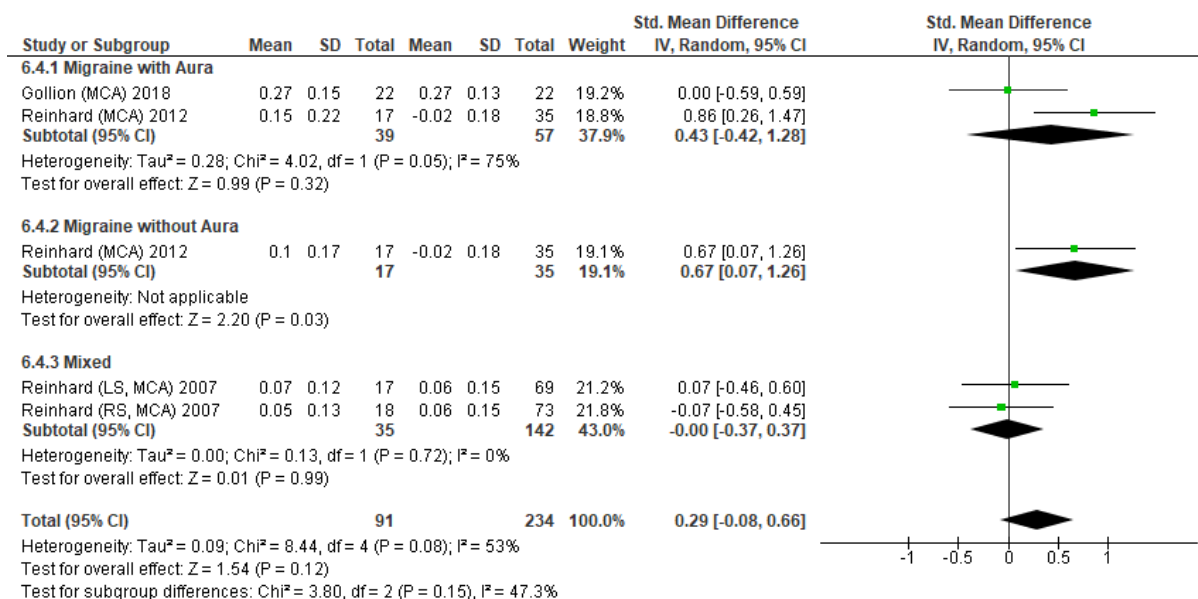

**Supplemental Figure 4: Forest plot of five quantitative comparisons of Dx in the anterior circulation in migraineurs versus controls taken from three studies**

Abbreviations: LS, left side of cerebral artery; MCA, middle cerebral artery; RS, right side of cerebral artery

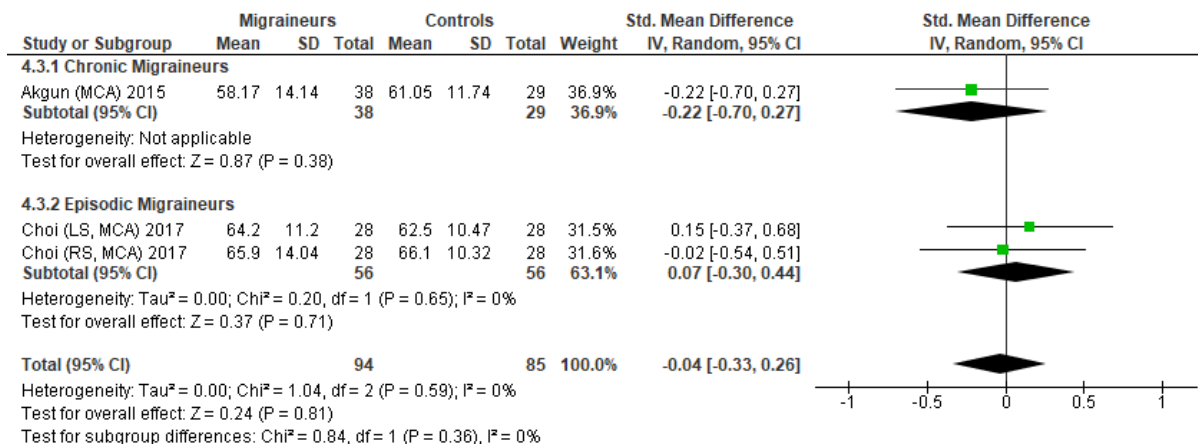

**Supplemental Figure 5: Forest plot of three quantitative comparisons of mean blood flow velocity in the anterior circulation in migraineurs versus controls taken from two studies**  
**Abbreviations:** LS, left side of cerebral artery; MCA, middle cerebral artery; RS, right side of cerebral artery

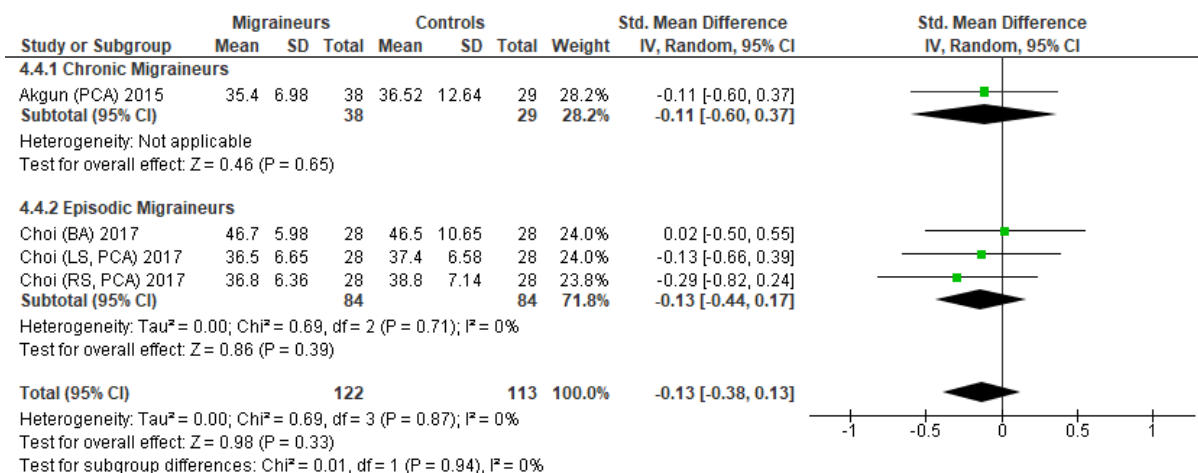

**Supplemental Figure 6: Forest plot of four quantitative comparisons of mean blood flow velocity in the posterior circulation in migraineurs versus controls taken from two studies**  
**Abbreviations:** BA, basilar artery; LS, left side of cerebral artery; PCA, posterior cerebral artery; RS, right side of cerebral artery;

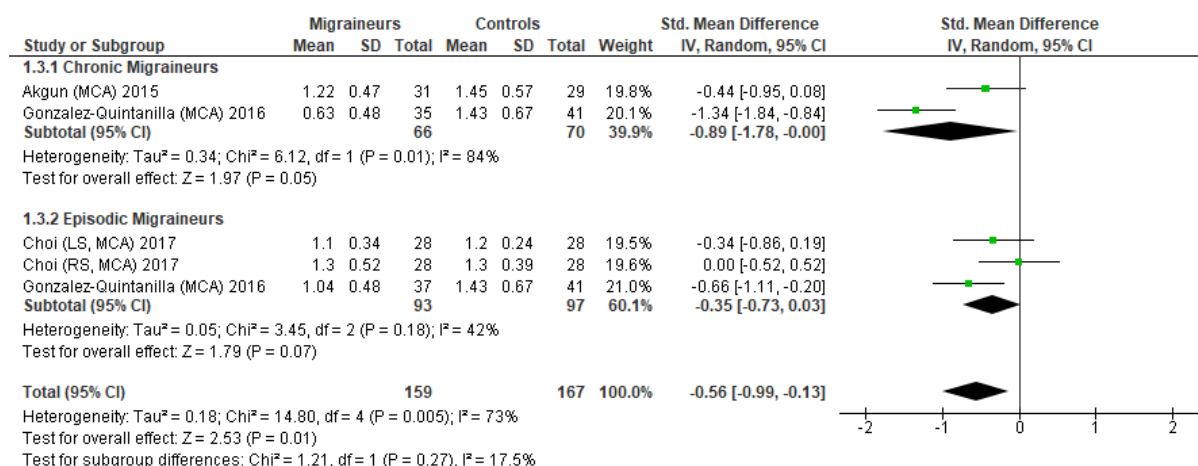

**Supplemental Figure 7: Forest plot of five quantitative comparisons of cerebrovascular responsiveness to hypercapnia in the anterior circulation in migraineurs versus controls taken from three studies**

**Abbreviations:** LS, left side of cerebral artery; MCA, middle cerebral artery; RS, right side of cerebral artery; VA, vertebral artery

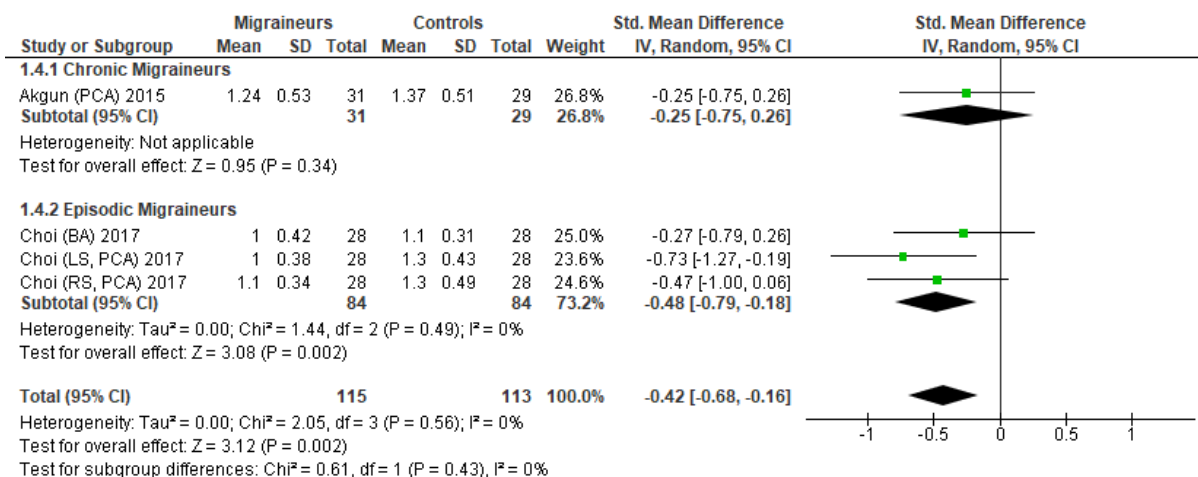

**Supplemental Figure 8: Forest plot of four quantitative comparisons of cerebrovascular responsiveness to hypercapnia in the posterior circulation in migraineurs versus controls taken from two studies**

**Abbreviations:** LS, left side of cerebral artery; PCA, posterior cerebral artery; RS, right side of cerebral artery

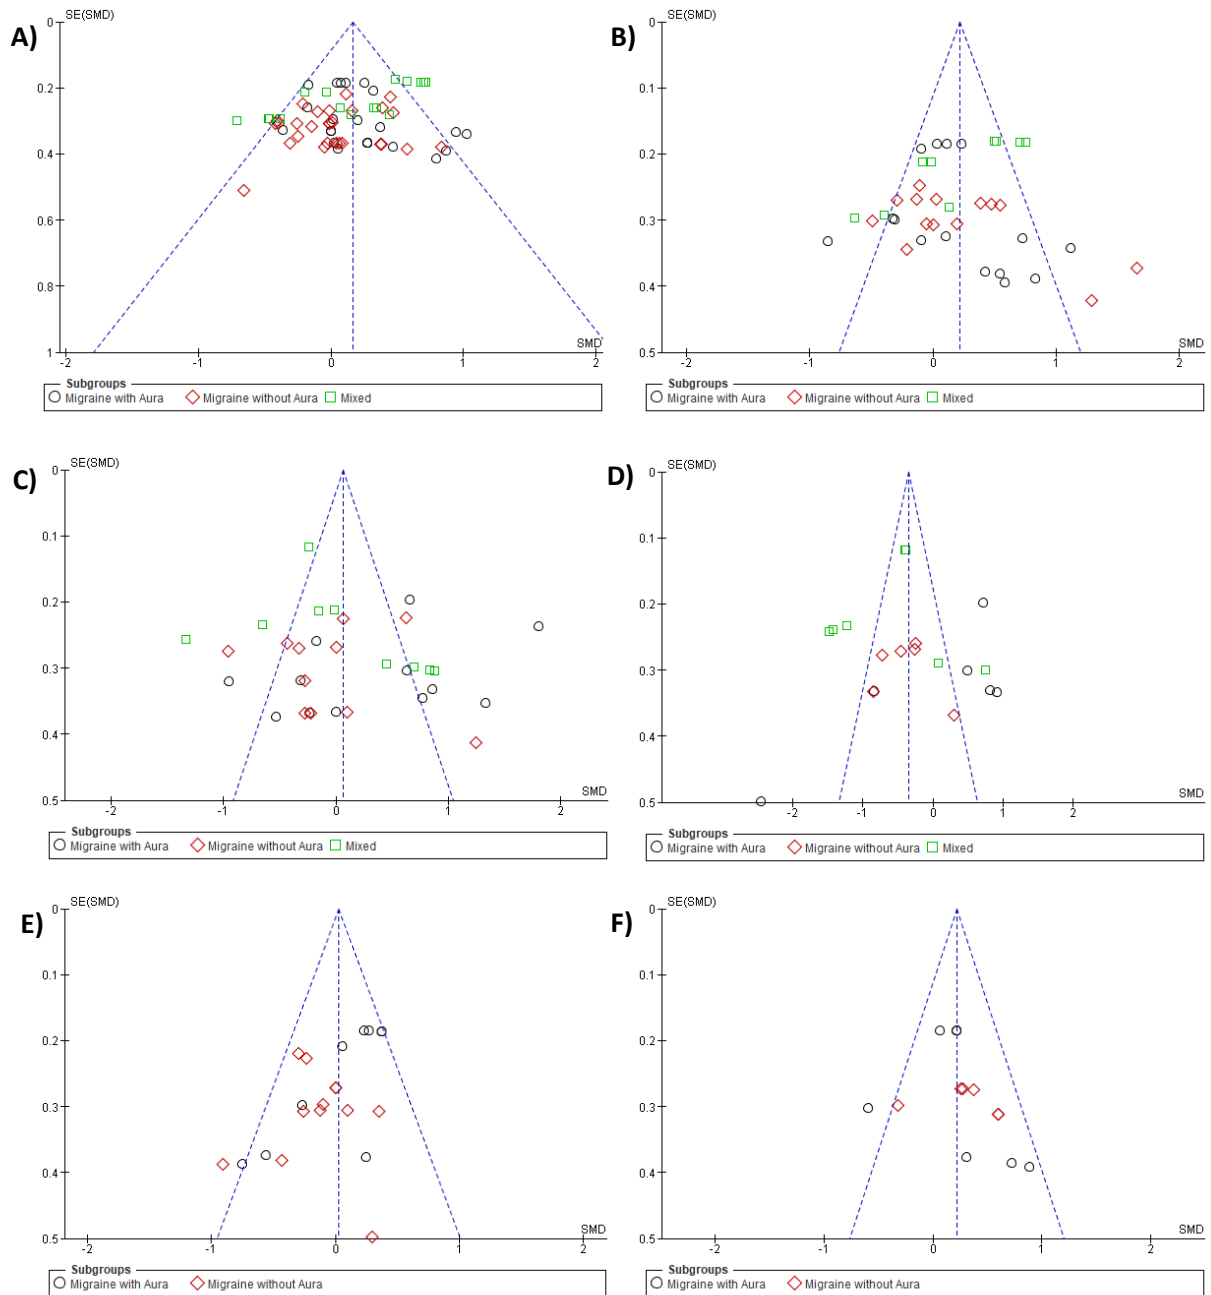

**Supplemental Figure 9:** Funnel plot with pseudo 95% confidence intervals for A) MBFV in the anterior circulation, B) MBFV in the posterior circulation, C) CVR to hypercapnia in the anterior circulation, D) CVR to hypercapnia in the posterior circulation E) PI in the anterior circulation and F) PI in the posterior circulation to evaluate publication bias

**Supplemental Table 1: Subgroup Analysis Summary**

| <b>Supplemental Table 1A: Subgroup Analysis Summary</b> |                                      |                      |                       |                                |                          |
|---------------------------------------------------------|--------------------------------------|----------------------|-----------------------|--------------------------------|--------------------------|
|                                                         |                                      |                      | <b>Overall Effect</b> | <b>Heterogeneity</b>           |                          |
|                                                         | <b>Subgroup</b>                      | <b>SMD (95%CI)</b>   | <b>P-Value</b>        | <b>Chi<sup>2</sup> P-Value</b> | <b>I<sup>2</sup> (%)</b> |
| <b>Anterior MBFV</b>                                    | MA                                   | 0.19 (0.06, 0.32)    | <0.01*                | 0.15                           | 23                       |
|                                                         | MO                                   | 0.04 (-0.08, 0.15)   | 0.55                  | 0.38                           | 5                        |
|                                                         | Mixed                                | 0.17 (-0.05, 0.39)   | 0.12                  | <0.01*                         | 74                       |
|                                                         | <i>Test for subgroup differences</i> |                      |                       | 0.20                           | 38                       |
| <b>Posterior MBFV</b>                                   | MA                                   | 0.16 (-0.06, 0.38)   | 0.15                  | <0.01*                         | 58                       |
|                                                         | MO                                   | 0.20 (-0.07, 0.46)   | 0.16                  | <0.01*                         | 67                       |
|                                                         | Mixed                                | 0.23 (-0.02, 0.49)   | 0.07                  | <0.01*                         | 76                       |
|                                                         | <i>Test for subgroup differences</i> |                      |                       | 0.92                           | 0                        |
| <b>Anterior PI</b>                                      | MA                                   | 0.10 (-0.11, 0.31)   | 0.35                  | 0.06                           | 46                       |
|                                                         | MO                                   | -0.14 (-0.31, 0.03)  | 0.10                  | 0.55                           | 0                        |
|                                                         | <i>Test for subgroup differences</i> |                      |                       | 0.08                           | 67                       |
| <b>Posterior PI</b>                                     | MA                                   | 0.20 (-0.08, 0.48)   | 0.16                  | 0.05                           | 51                       |
|                                                         | MO                                   | 0.29 (0.03, 0.55)    | 0.03*                 | 0.28                           | 21                       |
|                                                         | <i>Test for subgroup differences</i> |                      |                       | 0.66                           | 0                        |
| <b>Anterior CVRH</b>                                    | MA                                   | 0.33 (-0.15, 0.81)   | 0.17                  | <0.01*                         | 87                       |
|                                                         | MO                                   | -0.06 (-0.39, 0.26)  | 0.70                  | <0.01*                         | 71                       |
|                                                         | Mixed                                | 0.02 (-0.39, 0.44)   | 0.92                  | <0.01*                         | 87                       |
|                                                         | <i>Test for subgroup differences</i> |                      |                       | 0.40                           | 0                        |
| <b>Posterior CVRH</b>                                   | MA                                   | 0.00 (-0.80, 0.81)   | 1.00                  | <0.01*                         | 90                       |
|                                                         | MO                                   | -0.40 (-0.68, -0.11) | <0.01*                | 0.19                           | 33                       |
|                                                         | Mixed                                | -0.60 (-1.07, -0.14) | 0.01*                 | <0.01*                         | 91                       |
|                                                         | <i>Test for subgroup differences</i> |                      |                       | 0.44                           | 0                        |
| <b>Hypocapnia</b>                                       | MA                                   | -0.21 (-1.15, 0.73)  | 0.66                  | <0.01*                         | 85                       |
|                                                         | MO                                   | 0.17 (-0.25, 0.59)   | 0.43                  | 0.08                           | 52                       |
|                                                         | <i>Test for subgroup differences</i> |                      |                       | 0.47                           | 0                        |
| <b>NVC</b>                                              | MA                                   | 0.23 (-0.37, 0.83)   | 0.45                  | <0.01*                         | 80                       |
|                                                         | MO                                   | 0.10 (-0.61, 0.80)   | 0.78                  | 0.18                           | 45                       |
|                                                         | Mixed                                | 0.33 (-0.22, 0.88)   | 0.24                  | Not estimable                  | Not estimable            |
|                                                         | <i>Test for subgroup differences</i> |                      |                       | 0.88                           | 0                        |
| <b>Phase</b>                                            | MA                                   | -0.13 (0.42, 0.17)   | 0.40                  | 0.90                           | 0                        |
|                                                         | MO                                   | 0.53 (-0.06, 1.12)   | 0.08                  | Not estimable                  | Not estimable            |
|                                                         | Mixed                                | 0.39 (0.01, 0.77)    | 0.05                  | 0.96                           | 0                        |
|                                                         | <i>Test for subgroup differences</i> |                      |                       | 0.04                           | 69                       |
| <b>Gain</b>                                             | MA                                   | -0.07 (-0.36, 0.23)  | 0.65                  | 0.79                           | 0                        |
|                                                         | MO                                   | -0.61 (-1.20, -0.02) | 0.04                  | Not estimable                  | Not estimable            |
|                                                         | Mixed                                | -0.28 (-0.66, 0.10)  | 0.15                  | 0.92                           | 0                        |
|                                                         | <i>Test for subgroup differences</i> |                      |                       | 0.25                           | 28                       |
| <b>Mx</b>                                               | MA                                   | -0.20 (-0.79, 0.39)  | 0.67                  | Not estimable                  | Not estimable            |
|                                                         | Mixed                                | 0.16 (-0.38, 0.70)   | 0.56                  | 0.15                           | 52                       |
|                                                         | <i>Test for subgroup differences</i> |                      |                       | 0.37                           | 0                        |
| <b>Dx</b>                                               | MA                                   | 0.43 (-0.42, 1.28)   | 0.32                  | 0.05                           | 75                       |
|                                                         | MO                                   | 0.67 (0.07, 1.26)    | 0.03                  | Not estimable                  | Not estimable            |
|                                                         | Mixed                                | -0.00 (-0.37, 0.37)  | 0.99                  | 0.72                           | 0                        |
|                                                         | <i>Test for subgroup differences</i> |                      |                       | 0.15                           | 47                       |

**Abbreviations:** CVRH, cerebrovascular responsiveness to hypercapnia; MA, migraine with aura; MBFV, mean blood flow velocity; MO, migraine without aura; NVC, neurovascular coupling \*P-Value <0.05

| Supplemental Table 1B: Subgroup Analysis Summary |                                      |                      |                |                          |                    |
|--------------------------------------------------|--------------------------------------|----------------------|----------------|--------------------------|--------------------|
|                                                  |                                      |                      | Overall Effect | Heterogeneity            |                    |
|                                                  | Subgroup                             | SMD (95%CI)          | P-Value        | Chi <sup>2</sup> P-Value | I <sup>2</sup> (%) |
| <b>Anterior MBFV</b>                             | CM                                   | -0.22 (-0.70, 0.27)  | 0.38           | Not estimable            | Not estimable      |
|                                                  | EM                                   | -0.07 (-0.30, 0.44)  | 0.71           | 0.65                     | 0                  |
|                                                  | <i>Test for subgroup differences</i> |                      |                | 0.36                     | 0                  |
| <b>Posterior MBFV</b>                            | CM                                   | -0.11 (-0.60, -0.37) | 0.65           | Not estimable            | Not estimable      |
|                                                  | EM                                   | -0.13 (-0.44, 0.17)  | 0.39           | 0.71                     | 0                  |
|                                                  | <i>Test for subgroup differences</i> |                      |                | 0.94                     | 0                  |
| <b>Anterior CVRH</b>                             | CM                                   | -0.89 (-1.78, -0.00) | 0.05           | 0.01*                    | 84                 |
|                                                  | EM                                   | -0.35 (-0.73, 0.03)  | 0.07           | 0.18                     | 42                 |
|                                                  | <i>Test for subgroup differences</i> |                      |                | 0.27                     | 18                 |
| <b>Posterior CVRH</b>                            | CM                                   | -0.25 (-0.75, 0.26)  | 0.34           | Not estimable            | Not estimable      |
|                                                  | EM                                   | -0.48 (-0.79, -0.18) | <0.01*         | 0.49                     | 0                  |
|                                                  | <i>Test for subgroup differences</i> |                      |                | 0.43                     | 0                  |

**Abbreviations:** CM, chronic migraine; CVRH, cerebrovascular responsiveness to hypercapnia; EM, episodic migraine; MA, migraine with aura; MBFV, mean blood flow velocity; \*P-Value <0.05

**Supplemental Table 2: Egger's Test**

| <b>Supplemental Table 2: Egger's Test</b> |                  |                  |                |
|-------------------------------------------|------------------|------------------|----------------|
| <b>Comparison</b>                         | <b>Intercept</b> | <b>95% CI</b>    | <b>P-value</b> |
| <b>MBFV</b>                               |                  |                  |                |
| <b>Anterior Circulation</b>               | -1.201           | -2.480 to 0.077  | 0.065          |
| <b>Posterior Circulation</b>              | -0.826           | -2.870 to 1.218  | 0.418          |
| <b>CVR to Hypercapnia</b>                 |                  |                  |                |
| <b>Anterior Circulation</b>               | 1.407            | -1.857 to 4.672  | 0.386          |
| <b>Posterior Circulation</b>              | 0.228            | -3.764 to 4.221  | 0.905          |
| <b>PI</b>                                 |                  |                  |                |
| <b>Anterior Circulation</b>               | -2.652           | -4.427 to -0.878 | 0.006          |
| <b>Posterior Circulation</b>              | 1.472            | -1.526 to 4.471  | 0.303          |

**Abbreviations:** CVR, cerebrovascular reactivity; MBFV, mean blood flow velocity; PI, pulsatility index
